# Supplementary material
Source: publisher figshare collection journal article supplement (https://sage.figshare.com/ndownloader/files/18109700)
Supplement: Supplementary file 1 [file 18109700]

**Supplementary Table S1. Cox regression analysis for the association between inflammatory markers and the risk of cerebrovascular events in individuals who did not use antiplatelet or anticoagulant drugs** Results are presented for the sample as a whole and by presence of depressive symptoms and/or cognitive impairment

|                                        | All<br>(n=2302)           | Healthy<br>(n=868) | OD<br>(n=362)             | OC<br>(n=637)            | DC<br>(n=435)              |
|----------------------------------------|---------------------------|--------------------|---------------------------|--------------------------|----------------------------|
| <b>CVE cases (n)</b>                   | 155                       | 55                 | 18                        | 47                       | 35                         |
| <b>Fibrinogen, mg/dl</b>               |                           |                    |                           |                          |                            |
| Per each 10 mg/dl increase             | <b>1.02 (1.001-1.04)*</b> | 1.008 (0.97-1.05)  | 1.02 (0.96-1.08)          | 1.02 (0.98-1.06)         | <b>1.04 (1.002-1.08)*</b>  |
| <b>Tertiles</b>                        |                           |                    |                           |                          |                            |
| ≤311                                   | [Ref]                     | [Ref]              | [Ref]                     | [Ref]                    | [Ref]                      |
| 311-371                                | 1.31 (0.87-1.98)          | 1.04 (0.52-2.07)   | <b>5.06 (1.28-19.93)*</b> | 0.63 (0.29-1.38)         | <b>3.82 (1.22-11.95)*</b>  |
| >371                                   | <b>1.61 (1.07-2.43)*</b>  | 1.51 (0.79-2.90)   | 1.29 (0.29-5.77)          | 1.12 (0.54-2.32)         | <b>4.75 (1.55-14.57)**</b> |
| <b>WBC, 1x10<sup>9</sup>/L</b>         |                           |                    |                           |                          |                            |
| Per each 1x10 <sup>9</sup> /L increase | <b>1.05 (1.02-1.09)**</b> | 1.00 (0.84-1.20)   | 1.09 (0.79-1.51)          | 1.10 (0.97-1.24)         | <b>1.06 (1.02-1.11)**</b>  |
| <b>Tertiles</b>                        |                           |                    |                           |                          |                            |
| < 5.20                                 | [Ref]                     | [Ref]              | [Ref]                     | [Ref]                    | [Ref]                      |
| 5.21-6.49                              | <b>1.55 (1.04-2.31)*</b>  | 1.08 (0.57-2.05)   | 1.51 (0.42-5.41)          | <b>2.40 (1.08-5.33)*</b> | 1.95 (0.81-4.68)           |
| ≥ 6.49                                 | 1.36 (0.90-2.08)          | 1.25 (0.64-2.44)   | 1.83 (0.49-6.81)          | 1.75 (0.79-3.87)         | 1.06 (0.40-2.81)           |
| <b>ESR, mm/h</b>                       |                           |                    |                           |                          |                            |
| Per each 10 mm/h increase              | 1.02 (0.94-1.01)          | 1.03 (0.85-1.25)   | 0.98 (0.72-1.32)          | 1.07 (0.92-1.25)         | 0.99 (0.86-1.14)           |
| <b>Tertiles</b>                        |                           |                    |                           |                          |                            |
| ≤ 11                                   | [Ref]                     | [Ref]              | [Ref]                     | [Ref]                    | [Ref]                      |
| 11-22                                  | 1.02 (0.67-1.54)          | 0.85 (0.43-1.71)   | 0.44 (0.10-1.96)          | 0.75 (0.35-1.60)         | 0.65 (0.27-1.55)           |
| >22                                    | 1.36 (0.91-2.05)          | 0.60 (0.30-1.19)   | 0.94 (0.32-2.83)          | 0.70 (0.34-1.45)         | 0.87 (0.38-1.96)           |

Model adjusted for: age, sex, education, monthly income, level of physical activity, alcohol consumption, smoking habits, diabetes mellitus, cardiovascular disease.

*Abbreviations:* Healthy, individuals without depressive symptoms and cognitive impairment; OD, only depressive symptoms; OC, only with cognitive impairment; DC, subjects with depressive symptoms and cognitive impairment; CVE, cerebrovascular events; WBC, white blood cells; ESR, *erythrocyte sedimentation rate*; [Ref], *reference*. \*p<0.05, \*\*p<0.01, \*\*\*p<0.001.
